# Supplementary material for: Novel Dominant KCNQ2 Exon 7 Partial In-Frame Duplication in a Complex Epileptic and Neurodevelopmental Delay Syndrome
Source: Int J Mol Sci. 2020 Jun 23;21(12):4447. doi: 10.3390/ijms21124447 (PMC7352878; doi:10.3390/ijms21124447)
Supplement: Supplementary file 1 [file ijms-21-04447-s001.pdf]

## Supplementary Methods

### EXOME SEQUENCING Information

Type of Read: Paired-end  
Read Length: 101  
Number of Samples: 4  
Library Kit: SureSelectXT Library Prep Kit  
Library Protocol: SureSelectXT Target Enrichment System for Illumina Version B.2, April 2015  
Type of Sequencer: HiSeq 2000

#### DNA quality control:

Electrophoresis in gel agarose (1,5%) in TAE Buffer.

Fluorescence based DNA quantification in Qubit Fluorometer.

#### Generation of raw WES data:

The Illumina HiSeq generated raw images utilizing HCS (HiSeq Control Software v2.2) for system control and base calling through an integrated primary analysis software called RTA (Real Time Analysis. v1.18). The BCL (base calls) binary was converted into FASTQ utilizing illumina package bcl2fastq (v1.8.4).

#### Raw data statistics:

The total number of bases, reads, GC (%), Q20 (%), and Q30 (%) were calculated for the 4 samples.

For example, in CDC-PAD, 104,544,694 reads were produced, and total read bases were 10.6G bp. The GC content (%) was 47.87% and Q30 was 91.87%.

Table 1. Raw data Stats

| Sample ID | Total read bases (bp) | Total reads | GC(%) | AT(%) | Q20(%) | Q30(%) |
|-----------|-----------------------|-------------|-------|-------|--------|--------|
| CDC-PAD   | 10,559,014,094        | 104,544,694 | 47.87 | 52.13 | 95.71  | 91.87  |
| CDC-MAD   | 10,898,803,344        | 107,908,944 | 47.79 | 52.21 | 95.73  | 91.88  |
| CDC-HO    | 10,564,626,462        | 104,600,262 | 47.91 | 52.09 | 95.95  | 92.22  |
| CDC-HA    | 10,065,966,434        | 99,663,034  | 47.75 | 52.25 | 95.93  | 92.22  |

- Sample ID: Sample name.
- Total read bases: Total number of bases sequenced.
- Total reads: Total number of reads. In illumina paired-end sequencing, read1 and read2 are added.
- GC(%): GC content.
- AT(%): AT content.
- Q20(%): Ratio of reads that have phred quality score of over 20.
- Q30(%) Ratio of reads that have phred quality score of over 30.

#### Exome data analysis:

Human genome reference: GRCh38

Alignment, variant calling and filtering with CLC Genomics Workbench v7.5.2

**Supplementary Table S1**

| <b>DE NOVO MUTATIONS IN AFFECTED CHILD (Heterozygous)</b>           |                            |                          |                                             |                       |
|---------------------------------------------------------------------|----------------------------|--------------------------|---------------------------------------------|-----------------------|
| <b>GENE</b>                                                         | <b>Aminoacid change</b>    | <b>Mutation Position</b> | <b>Frequency Variant/alleles (ExAC) [1]</b> | <b>Inheritance</b>    |
| KCNQ2                                                               | Partial exon 7 duplication | This report              |                                             | De novo heterozygosis |
| MPPED1                                                              |                            | 22_43831052_C/T          |                                             | De novo               |
|                                                                     |                            |                          |                                             |                       |
| <b>INHERITED DE NOVO MUTATIONS IN AFFECTED CHILD (Heterozygous)</b> |                            |                          |                                             |                       |
|                                                                     |                            |                          |                                             |                       |
| RARS2                                                               | S443P                      | Exon 16, c.1327T>C       | 5/121272                                    | Father heterozygosis  |

| <b>RECESSIVE gene variants IN AFFECTED CHILD (Homozygous)</b> |                                         |                             |                                                                                           |                           |
|---------------------------------------------------------------|-----------------------------------------|-----------------------------|-------------------------------------------------------------------------------------------|---------------------------|
| <b>Gene</b>                                                   | <b>Aminoacid change</b>                 | <b>Presentation</b>         | <b>Variant ID</b>                                                                         | <b>Potential effect</b>   |
|                                                               |                                         |                             |                                                                                           |                           |
| ZNF398                                                        | R8Q                                     | Intronic variant            | rs917123                                                                                  | Damaging “low confidence” |
| KLHL38                                                        | C504Y                                   | homozygous                  | rs11779866                                                                                | damaging                  |
| NPBWR1                                                        | Y135F                                   | homozygous                  | rs33977775                                                                                | damaging                  |
| SCARF1                                                        | I510I or S498L                          | Variant in aberrant message | rs34849297                                                                                | damaging                  |
| LIPF                                                          | T161A                                   | homozygous                  | rs814628                                                                                  | damaging                  |
| OR51B6                                                        | N40S<br>I90T<br>T131I<br>L172F<br>S275R |                             | rs4910756<br><u>rs7483122</u><br><u>rs5006886</u><br><u>rs5006884</u><br><u>rs5024042</u> | damaging                  |
| AKIP1                                                         | T170M, T143M                            | Intron variant              | rs2016844                                                                                 | damaging                  |
| ANXA11                                                        | R230C                                   |                             | rs1049550                                                                                 | damaging                  |
| NPNT                                                          | Q189H                                   |                             | rs35132891                                                                                | damaging                  |
| C7orf31                                                       | A158T                                   |                             | rs12535348                                                                                | damaging                  |
| OR1D2                                                         | T240I                                   | homozygous                  | rs4300683                                                                                 | damaging                  |
| OR51B5                                                        | I102T                                   |                             | rs11036912                                                                                | damaging                  |
| CRYBG3                                                        | N926H                                   |                             | rs4857302                                                                                 | damaging                  |
| SGSM2                                                         | R374Q                                   |                             | rs2248821                                                                                 | damaging                  |
| SLC22A18                                                      | R12Q                                    | homozygous                  | rs1048047                                                                                 | Damaging                  |
| OR5H14                                                        | G64R                                    |                             | rs4241468                                                                                 | damaging                  |
| TMEM71                                                        | Upstream variant                        |                             | rs1895807                                                                                 | Damaging, low confidence  |
| NAALADL2                                                      | P622R                                   | homozygous                  | rs9866564                                                                                 | Damaging                  |

[1] K.J. Karczewski, B. Weisburd, B. Thomas, M. Solomonson, D.M. Ruderfer, D. Kavanagh, T. Hamamsy, M. Lek, K.E. Samocha, B.B. Cummings, D. Birnbaum, C. The Exome Aggregation, M.J. Daly, and D.G. MacArthur, The ExAC browser: displaying reference data information from over 60 000 exomes. Nucleic Acids Res 45 (2017) D840-D845.

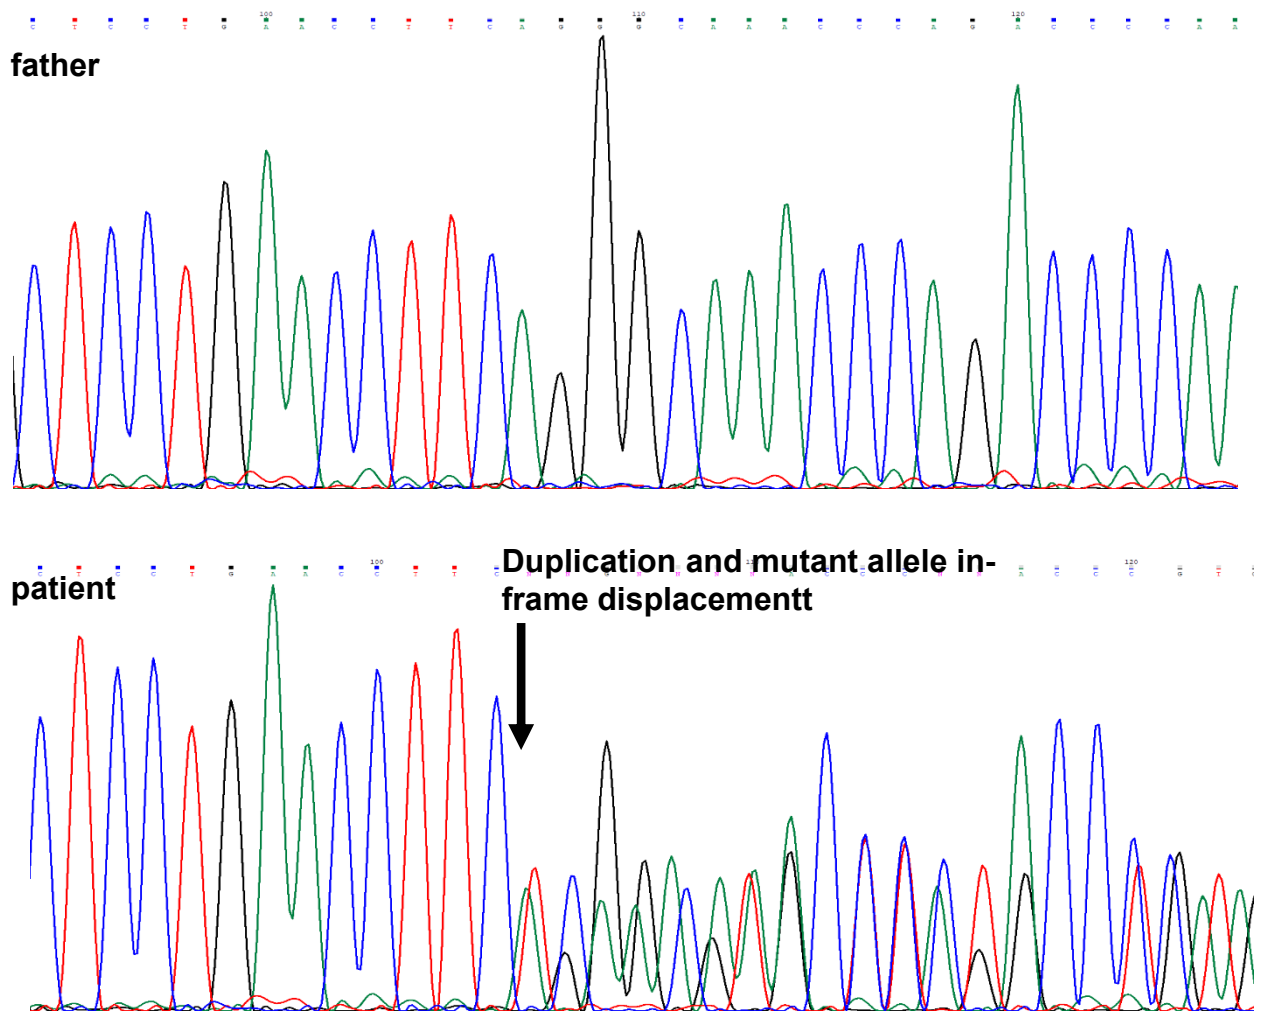

**Supplementary Figure S1.** Sanger sequence showing the normal allele (top chromatogram) and the allele in the patient (lower chromatogram) with the location (arrow) of the duplication one allele. From this position there is an overlap of the two alleles sequences.

WT

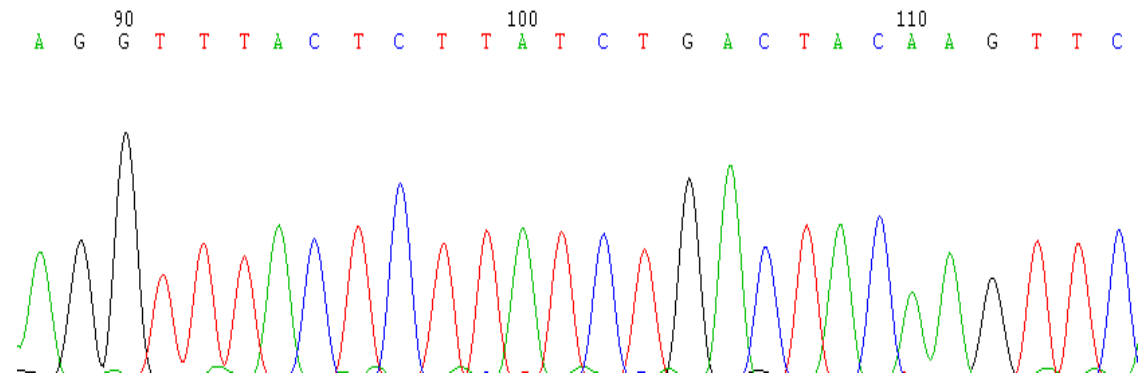

Mutant T>C

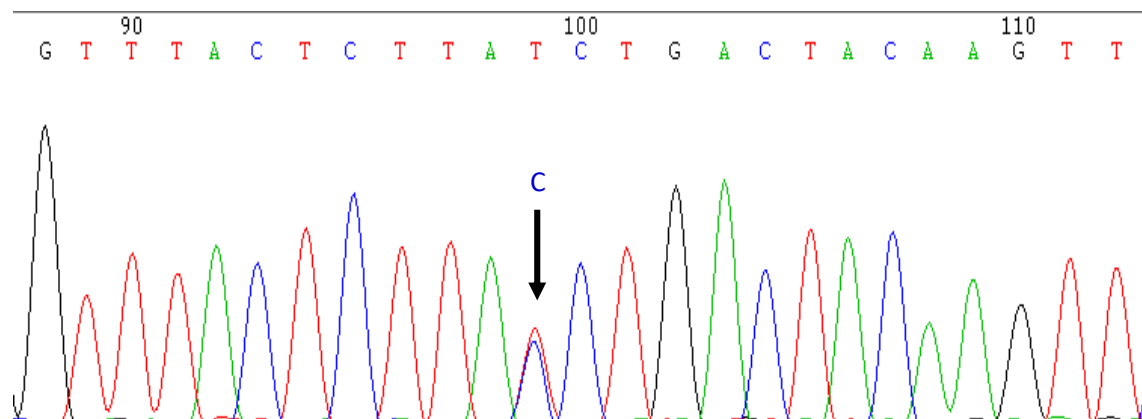

**Supplementary Figure S2.** Sanger sequence of the *RARS2* gene showing the normal allele (top chromatogram) and the allele in the patient (lower chromatogram) with the location (arrow) of the nucleotide substitution (T > C).
